# Supplementary material for: Plantaginis Semen polysaccharides ameliorate renal damage through regulating NLRP3 inflammasome in gouty nephropathy rats
Source: Royal Society of Chemistry journal article supplement (doi:10.1039/d0fo03143g), 2021-01-01
Supplement: d0fo03143g1.pdf [file d0fo03143g1.pdf]

**Table S1** The physicochemical properties of the PSPs

| Method                            | PSP-D         | PSP-H         | PSP-S          |
|-----------------------------------|---------------|---------------|----------------|
| Color observation                 | Black.        | Cameo brown   | Brown          |
| $\alpha$ -Naphthol reaction       | (+)           | (+)           | (+)            |
| Solubility test                   | Water soluble | Water soluble | Alkali soluble |
| Iodination reaction               | (-)           | (-)           | (-)            |
| Fehling's test                    | (+)           | (+)           | (+)            |
| FeCl <sub>3</sub> reaction        | (-)           | (-)           | (-)            |
| Peak at UV 280 nm                 | (+)           | (+)           | (+)            |
| Phenol–Sulfuric acid test         | (+)           | (+)           | (+)            |
| Coomassie brilliant blue reaction | (+)           | (+)           | (+)            |
| Sulfuric acid -Carbazole reaction | (+)           | (+)           | (+)            |
| content of polysaccharide (%)     | 45.51         | 53.53         | 43.92          |
| content of protein (%)            | 3.50          | 1.83          | 2.36           |
| content of glycuronic acid (%)    | 22.74         | 21.46         | 37.12          |

+ Positive - Negative

**Table S2** The result of monosaccharide compositions of PSPs

| Preparation<br>number of peak | Molar ratios (mol%) |     |     |       |       |     |     |     |      |     |
|-------------------------------|---------------------|-----|-----|-------|-------|-----|-----|-----|------|-----|
|                               | 1                   | 2   | 3   | 4     | 5     | 6   | 7   | 8   | 9    | 10  |
|                               | Man                 | Rib | Rha | GlcUA | GalUA | Glc | Gal | Xyl | Ara  | Fuc |
| PSP-D                         | 1.0                 | -   | -   | -     | 6.63  | -   | -   | -   | 13.7 | 8.6 |
| PSP-H                         | 3.7                 | -   | -   | -     | 4.0   | 1.0 | -   | -   | 16.3 | 5.9 |
| PSP-S                         | 5.8                 | 0.2 | -   | 2.4   | 9.7   | 3.4 | 1.0 | 5.7 | 14.2 | 7.9 |
